# Supplementary material
Source: HighWire-hosted journal article supplement (https://bmjopenquality.bmj.com/content/5/1/u204088.w3767)

Figure 1. Average OKS improvement per PDSA cycle (95% CIs)

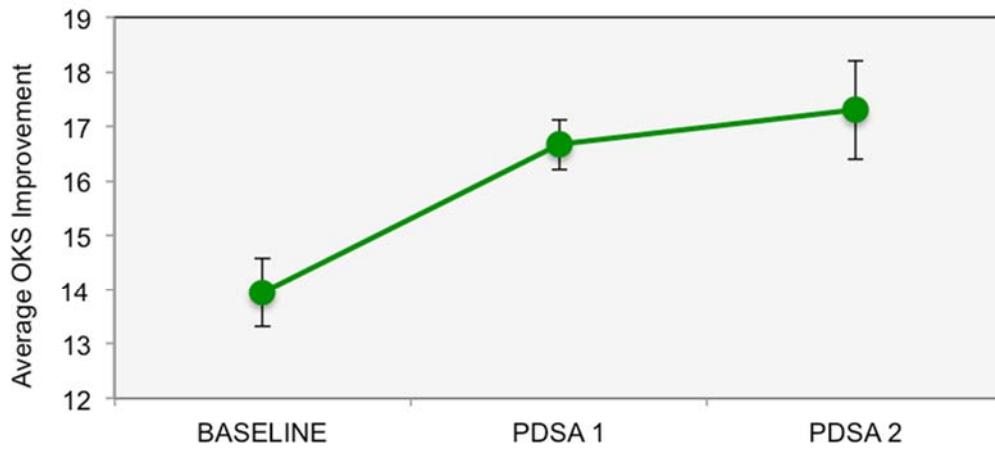

Figure 2. Average EQ-5D improvement per PDSA cycle (95% CIs)

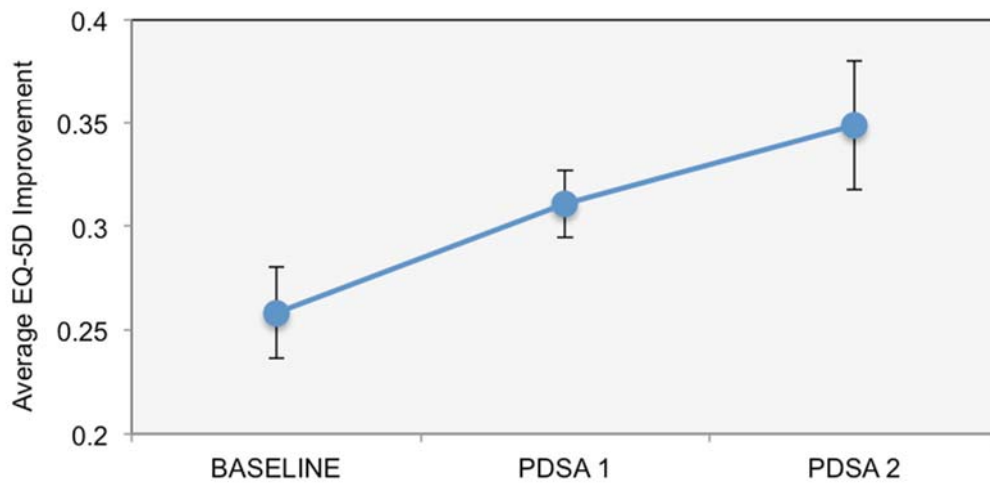

Supplement: inline-supplementary-material-1 [file inline-supplementary-material-1.pdf]
